# Supplementary material
Source: PubMed Central journal article supplement (PMC8233850)
Supplement: mmc1.pdf [file mmc1.pdf]

**Supplemental information**

**Antibody landscape against SARS-CoV-2 reveals  
significant differences between non-structural/  
accessory and structural proteins**

**Yang Li, Zhaowei Xu, Qing Lei, Dan-yun Lai, Hongyan Hou, He-wei Jiang, Yun-xiao Zheng, Xue-ning Wang, Jiaoxiang Wu, Ming-liang Ma, Bo Zhang, Hong Chen, Caizheng Yu, Jun-biao Xue, Hai-nan Zhang, Huan Qi, Shu-juan Guo, Yandi Zhang, Xiaosong Lin, Zongjie Yao, Huiming Sheng, Ziyong Sun, Feng Wang, Xionglin Fan, and Sheng-ce Tao**

## **Supplemental Information**

**Figure S1. SARS-CoV-2 proteome microarray and the assessment of reproducibility (related to Figure 1).**

**Figure S2. High associations among non-structural/ accessory proteins to elicit IgG response in patients (related to Figure 2).**

**Figure S3. Antibody responses are not associated with protein abundance or length (related to Figure 2).**

**Figure S4. IgG responses are associated with clinical parameters (related to figure 3).**

**Table S1. Serum Samples and patients (related to Figure 1).**

**Table S2. SARS-CoV-2 proteins included in the proteome microarray (related to Figure 1 and Figure S1).**

**Table S3. IgG responses are associated with clinical parameters (related to Figure 3 and Figure S3).**

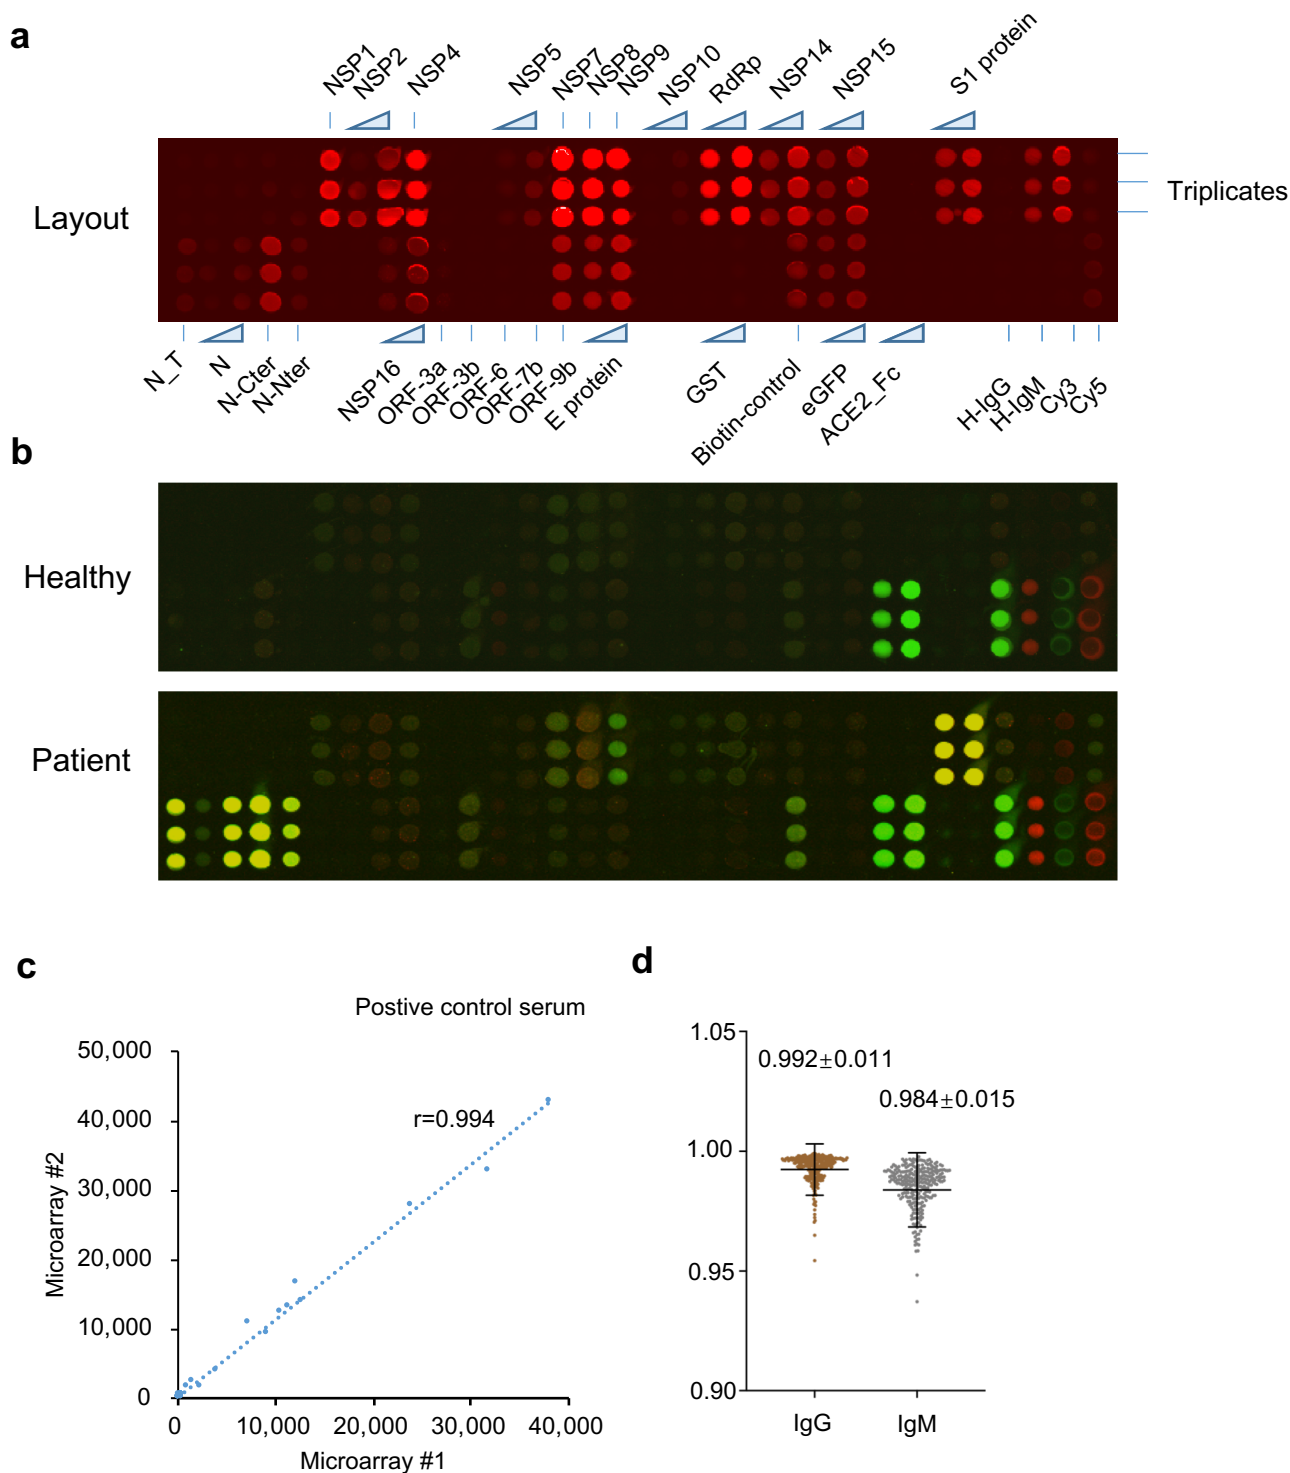

**Figure S1. SARS-CoV-2 proteome microarray and the assessment of reproducibility (related to Figure 1).** **a.** The layout of the SARS-CoV-2 proteome microarray. The locations of proteins and controls are indicated. **b.** Representative images of the microarray screened by sera from a healthy control and a COVID-19 patient. **c.** Correlation analysis between two microarrays probed independently with a positive control serum. **d.** Statistical analysis of the Pearson correlation coefficients between the microarrays incubated with the positive control serum with the averaged data set (see methods). The data are present as mean  $\pm$  SD.

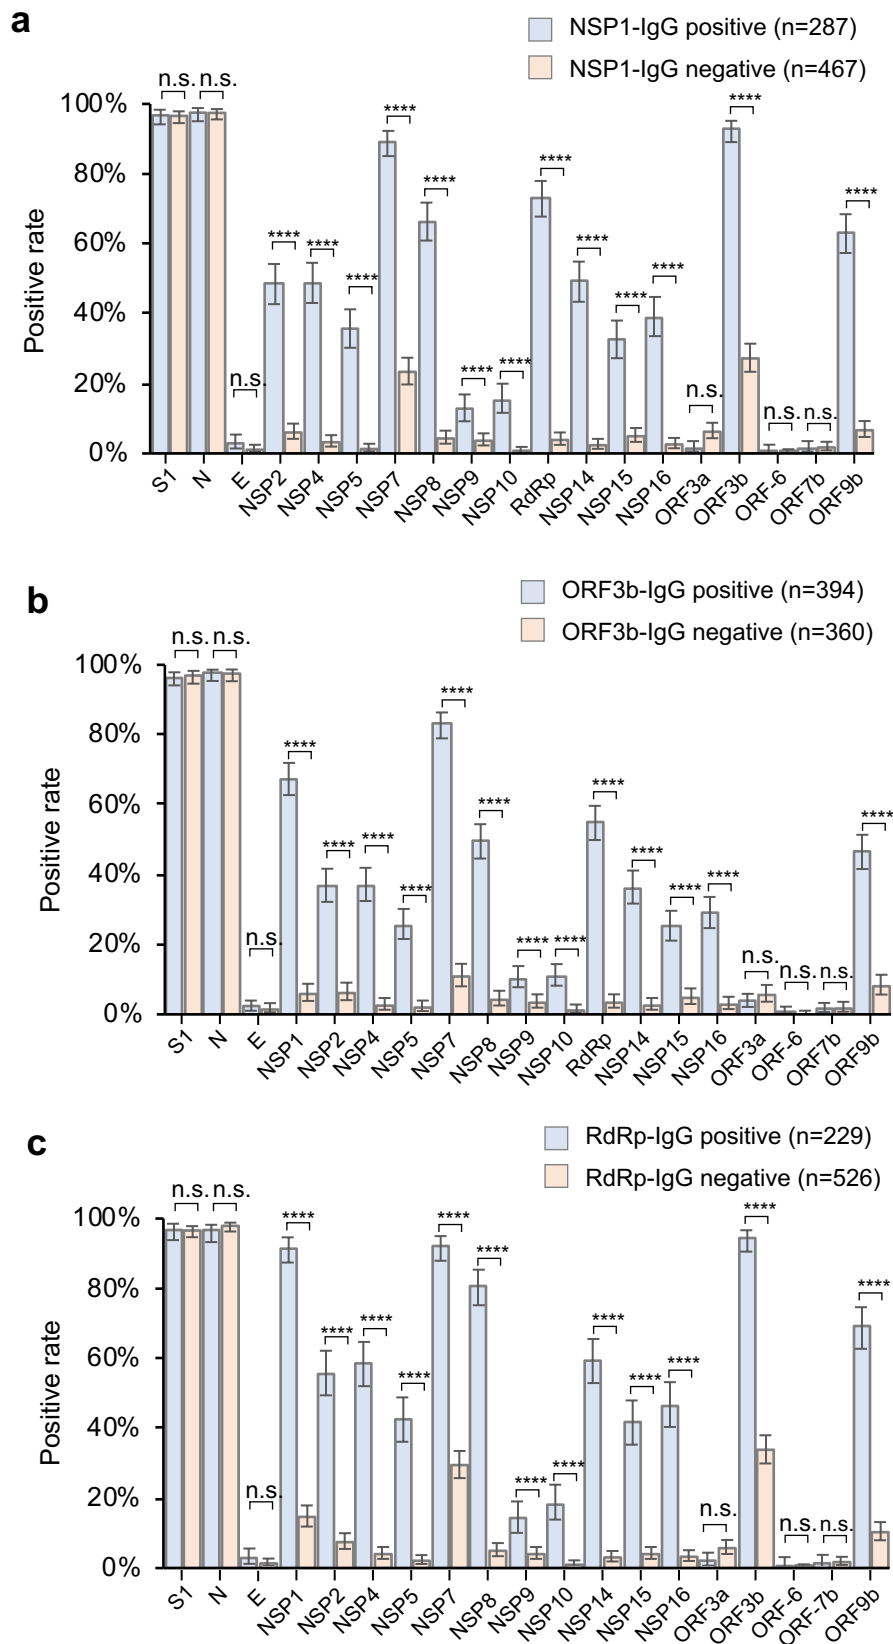

**Figure S2. High associations among non-structural/ accessory proteins to elicit IgG response in patients (related to Figure 2).** a-c, Antibody positive rates for all the SARS-CoV-2 proteins in two patient groups divided depending on positive or negative for NSP1 (a), ORF3b (b) and RdRp (c). Error bar was given as the 95% confidential interval. P-value was calculated by two-sided  $\chi^2$  test. \*,  $P < 0.05$ , \*\*,  $P < 0.01$ , \*\*\*,  $P < 0.001$ , \*\*\*\*,  $P < 0.0001$ , n. s., not significant.

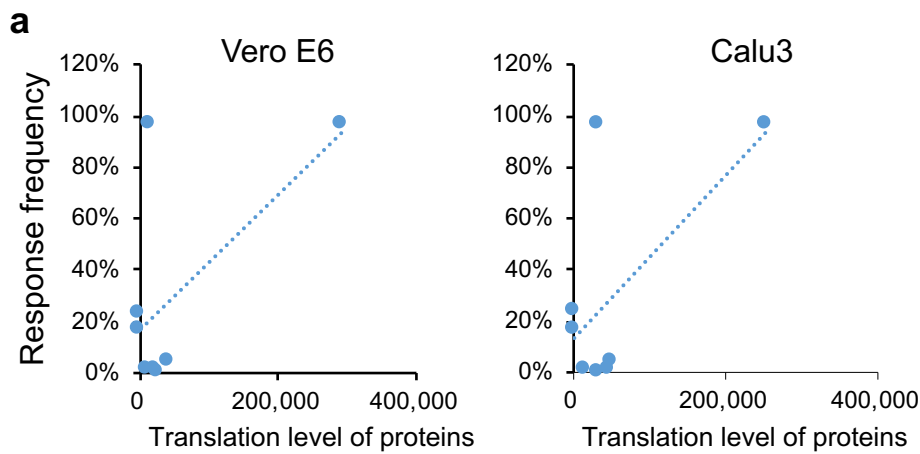

| Protein   | Translation level |          | response frequency |
|-----------|-------------------|----------|--------------------|
|           | Vero E6           | Calu3    |                    |
| ORF1a     | 659.2             | 1640.7   | 24%                |
| ORF1b     | 394.3             | 852.9    | 17.30%             |
| S protien | 15648.7           | 34603.9  | 96.7%              |
| ORF3a     | 40845.5           | 50519.3  | 4.5%               |
| E protein | 12351.5           | 14590.6  | 1.7%               |
| ORF6      | 25280.8           | 33751.7  | 0.4%               |
| ORF7b     | 20951.1           | 46634.2  | 1.6%               |
| N protein | 293655.1          | 252780.7 | 97.4%              |

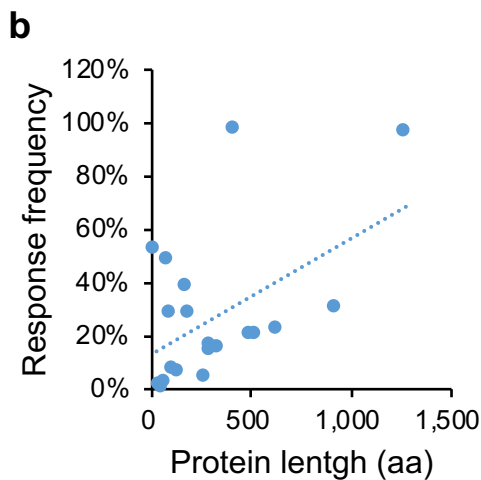

| Protein   | Length (aa) | Response frequency |
|-----------|-------------|--------------------|
| S         | 1273        | 96.7%              |
| N protein | 421         | 97.4%              |
| E protein | 75          | 1.7%               |
| NSP1      | 180         | 38.0%              |
| NSP2      | 638         | 22.1%              |
| NSP4      | 500         | 20.5%              |
| NSP5      | 306         | 14.3%              |
| NSP7      | 83          | 48.4%              |
| NSP8      | 198         | 27.9%              |
| NSP9      | 113         | 7.0%               |
| NSP10     | 139         | 6.2%               |
| RdRp      | 932         | 30.3%              |
| NSP14     | 527         | 20.1%              |
| NSP15     | 345         | 15.3%              |
| NSP16     | 298         | 16.4%              |
| ORF3a     | 275         | 4.5%               |
| ORF3b     | 22          | 52.1%              |
| ORF6      | 61          | 0.4%               |
| ORF7b     | 43          | 1.6%               |
| ORF9b     | 99          | 28.0%              |

**Figure S3. Antibody responses are not associated with protein abundance or length (related to Figure 2). a-b.** Correlations between antibody positive rate and protein abundance (Finkel et al., 2020) (**a**), and protein length (**b**).

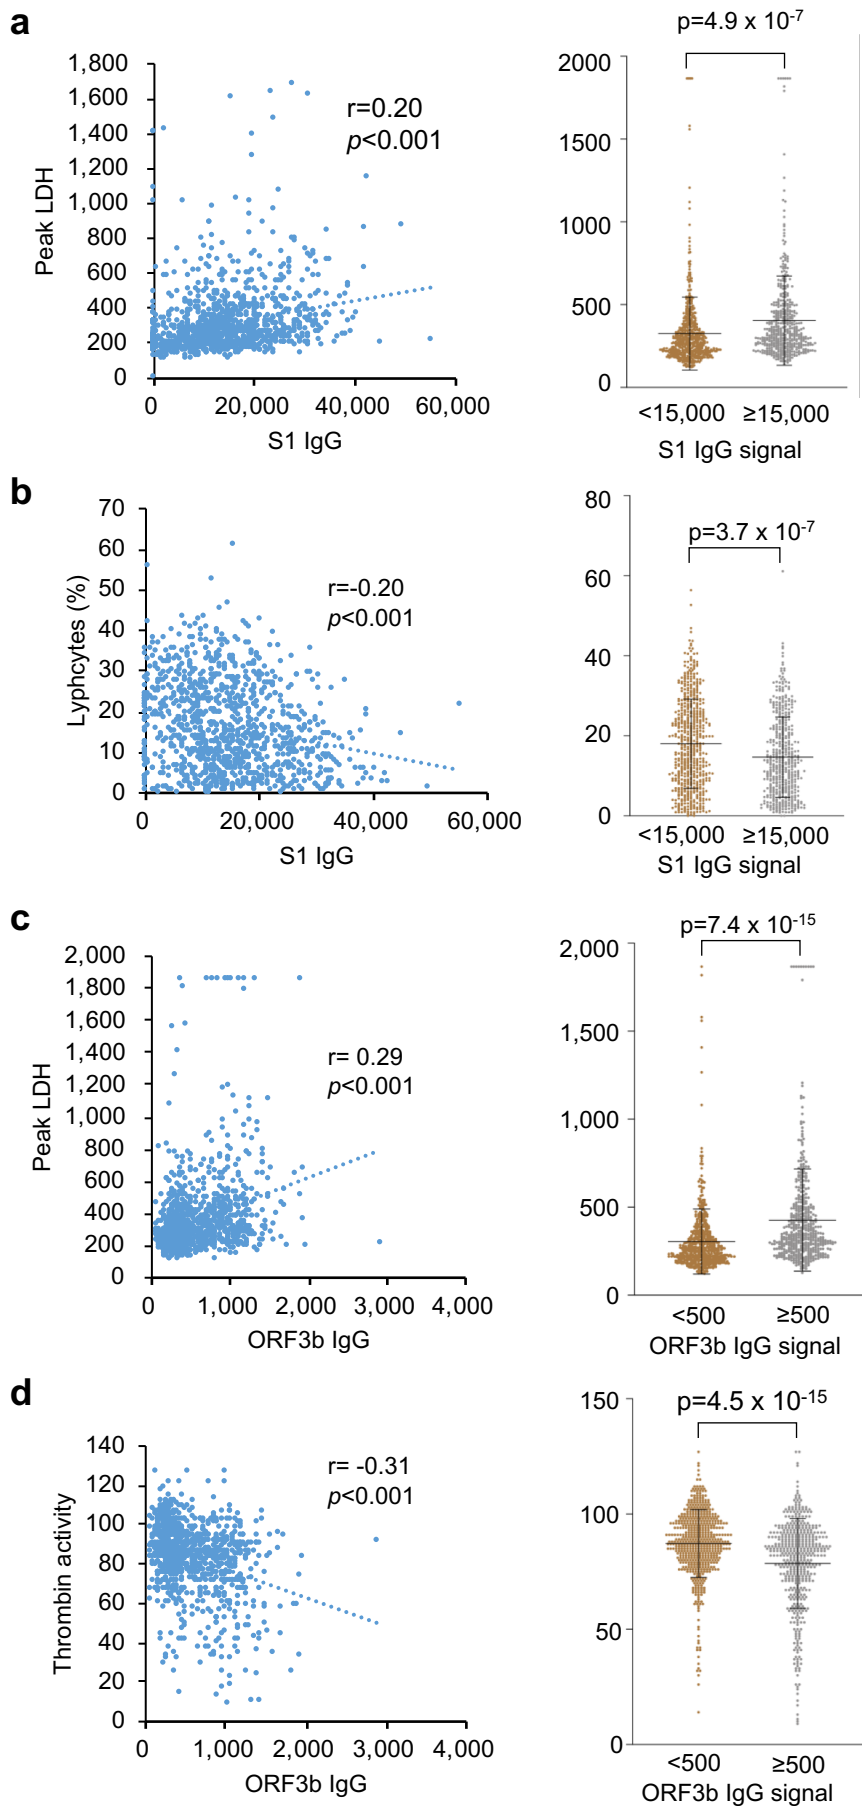

**Figure S4. IgG responses are associated with clinical parameters (related to figure 3).** **a-d.** Correlations and statistical analysis of IgG response against indicate proteins and clinical parameters. The right part for each panel depicts the distribution of the values for corresponding clinical parameter in lower and higher IgG response groups. *P*-values were calculated with two-sided *t* test.

**Table S1. Serum samples and patients (related to Figure 1)**

| Group                                      |                        | COVID-19               | Control-1                                                                                            | Control-2                                                     |
|--------------------------------------------|------------------------|------------------------|------------------------------------------------------------------------------------------------------|---------------------------------------------------------------|
| Patients (n)                               |                        | 783                    | 528                                                                                                  | 73                                                            |
| Serum samples (n)                          |                        | 2,360                  | 528                                                                                                  | 73                                                            |
| Patients with samples >14 days after onset |                        | 756                    | -                                                                                                    | -                                                             |
| Age                                        |                        | 61.4 ± 14.5            | 53.0 ± 20.5                                                                                          | N/A                                                           |
| Gender                                     | Male                   | 377                    | 252                                                                                                  | N/A                                                           |
|                                            | Female                 | 379                    | 276                                                                                                  | N/A                                                           |
| Severity/ outcome                          | non-severe             | 347                    |                                                                                                      |                                                               |
|                                            | Severe (survivors)     | 354                    | -                                                                                                    | -                                                             |
|                                            | Severe (non-survivors) | 55                     |                                                                                                      |                                                               |
| Source                                     |                        | Tongji Hospital, Wuhan | Tongren Hospital, Shanghai Ruijin Hospital, Shanghai                                                 | National Institutes for Food and Drug Control, Beijing, China |
| Subtype and number                         |                        | -                      | Healthy: 142; Infection diseases: 141; Autoimmune diseases: 120; Lung cancer: 48; Other diseases: 77 | Negative reference samples                                    |

**Table S2. SARS-CoV-2 proteins included in the proteome microarray (related to Figure 1 and Figure S1)**

| Protein ID | Name      | Resources                           | Concentration (mg/mL) | Tag(s)        | Expression system |
|------------|-----------|-------------------------------------|-----------------------|---------------|-------------------|
| 1          | S1        | Hangzhou Bioeast biotech (SC2S302)  | 0.17, 0.5             | C-His         | Mammalian Cells   |
| 2          | N Protein | Our Lab                             | 0.125                 | C-His         | <i>E. coli</i>    |
|            | N Protein | VACURE Biotechnology (AG-PL-2101)   | 0.08, 0.25            | C-His         | Mammalian Cells   |
|            | N-Cter    | Healthcode PROTN_nCoV-N-CterHG01000 | 0.25                  | N-His/C-EGFP  | Cell free(Yeast)  |
|            | N-Nter    | Healthcode PROTN_nCoV-N-NterHG01000 | 0.25                  | N-His/C-EGFP  | Cell free(Yeast)  |
| 3          | NSP1      | Our Lab                             | 0.125                 | C-His         | <i>E. coli</i>    |
| 4          | NSP2      | Healthcode PROTN_nCoVNSP2HG01000    | 0.17, 0.5             | N-His/C-EGFP  | Cell free(Yeast)  |
| 5          | NSP4      | Our Lab                             | 0.1                   | His-Trx/C-His | <i>E. coli</i>    |
| 6          | NSP5      | Healthcode PROTN_nCoV3CipHG01000    | 0.17, 0.5             | N-His/C-EGFP  | Cell free(Yeast)  |
| 7          | NSP7      | Our Lab                             | 0.125                 | C-His         | <i>E. coli</i>    |
| 8          | NSP8      | Our Lab                             | 0.25                  | C-His         | <i>E. coli</i>    |
| 9          | NSP9      | Our Lab                             | 0.25                  | C-His         | <i>E. coli</i>    |
| 10         | NSP10     | Our Lab                             | 0.17, 0.5             | C-His         | <i>E. coli</i>    |
| 11         | RdRp      | H. Eric Xu's Lab                    | 0.17, 0.5             | His           | Insect Cells      |
| 12         | NSP14     | Healthcode PROTN_nCoVNSP14HG01000   | 0.17, 0.5             | N-His/C-EGFP  | Cell free(Yeast)  |
| 13         | NSP15     | Healthcode PROTN_nCoVNdUHG01000     | 0.17, 0.5             | N-His/C-EGFP  | Cell free(Yeast)  |
| 14         | NSP16     | Healthcode PROTN_nCoVOMTHG01000     | 0.17,0.5              | N-His/C-EGFP  | Cell free(Yeast)  |
| 15         | ORF-3a    | Our Lab                             | 0.1                   | N-GST/C-His   | <i>E. coli</i>    |
| 16         | ORF-3b    | Our Lab                             | 0.1                   | N-GST/C-His   | <i>E. coli</i>    |
| 17         | ORF6      | Our Lab                             | 0.1                   | N-GST/C-His   | <i>E. coli</i>    |
| 18         | ORF-7b    | Our Lab                             | 0.125                 | N-GST/C-His   | <i>E. coli</i>    |
| 19         | ORF-9b    | Our Lab                             | 0.125                 | C-His         | <i>E. coli</i>    |
| 20         | E-protein | Healthcode PROTN_nCoVehHG01000      | 0.17, 0.5             | N-His/C-EGFP  | Cell free(Yeast)  |



**Table S3 . IgG responses are associated with clinical parameters (related to Figure 3 and Figure S3)**

|                      | S1    | N     | NSP1  | NSP7  | NSP8  | RdRp  | ORF3b | ORF9b |
|----------------------|-------|-------|-------|-------|-------|-------|-------|-------|
| Neutrophils(#)       | 0.13  | 0.04  | 0.18  | 0.15  | 0.08  | 0.18  | 0.26  | 0.11  |
| Neutrophils(%)       | 0.23  | 0.12  | 0.23  | 0.18  | 0.11  | 0.22  | 0.29  | 0.14  |
| LDH                  | 0.2   | 0.11  | 0.21  | 0.15  | 0.1   | 0.23  | 0.29  | 0.13  |
| Globulin             | 0.28  | 0.19  | 0.23  | 0.19  | 0.11  | 0.21  | 0.33  | 0.17  |
| Urea                 | 0.12  | 0.03  | 0.2   | 0.13  | 0.09  | 0.21  | 0.27  | 0.1   |
| Bicarbonate          | 0.21  | 0.11  | 0.23  | 0.13  | 0.13  | 0.24  | 0.31  | 0.18  |
| CRP                  | 0.24  | 0.12  | 0.26  | 0.16  | 0.13  | 0.25  | 0.33  | 0.16  |
| D-dimer              | 0.22  | 0.12  | 0.23  | 0.14  | 0.06  | 0.18  | 0.27  | 0.09  |
| Fibrinogen           | 0.32  | 0.23  | 0.2   | 0.23  | 0.1   | 0.18  | 0.27  | 0.16  |
| FDP                  | 0.18  | 0.08  | 0.18  | 0.2   | 0.08  | 0.18  | 0.28  | 0.06  |
| Myoglobin            | 0.06  | -0.05 | 0.18  | 0.12  | 0.07  | 0.21  | 0.29  | 0.1   |
| ESR                  | 0.27  | 0.16  | 0.11  | 0.1   | 0.02  | 0.08  | 0.22  | 0.11  |
| Lymphocyte(#)        | -0.2  | -0.12 | -0.21 | -0.15 | -0.1  | -0.2  | -0.27 | -0.13 |
| Lymphocyte(%)        | -0.23 | -0.11 | -0.22 | -0.18 | -0.1  | -0.2  | -0.28 | -0.13 |
| Platele count        | -0.06 | 0.01  | -0.18 | -0.11 | -0.07 | -0.18 | -0.26 | -0.09 |
| Eosinophils(#)       | -0.17 | -0.13 | -0.18 | -0.15 | -0.12 | -0.2  | -0.25 | -0.14 |
| Eosinophils(%)       | -0.18 | -0.12 | -0.21 | -0.17 | -0.14 | -0.22 | -0.27 | -0.16 |
| Plateletcrit         | -0.07 | 0.01  | -0.19 | -0.11 | -0.07 | -0.18 | -0.26 | -0.1  |
| Calcium              | -0.25 | -0.12 | -0.25 | -0.17 | -0.14 | -0.28 | -0.36 | -0.17 |
| Total cholesterol    | -0.13 | -0.09 | -0.21 | -0.11 | -0.06 | -0.2  | -0.26 | -0.13 |
| Albumin              | -0.32 | -0.16 | -0.27 | -0.18 | -0.14 | -0.27 | -0.36 | -0.19 |
| Albumin/ globulin    | -0.35 | -0.23 | -0.27 | -0.2  | -0.14 | -0.26 | -0.37 | -0.21 |
| Prothrombin activity | -0.14 | -0.08 | -0.23 | -0.26 | -0.11 | -0.21 | -0.31 | -0.1  |
| Phosphorus           | -0.13 | -0.07 | -0.18 | -0.16 | -0.06 | -0.17 | -0.3  | -0.08 |
| Antithrombin         | -0.09 | -0.04 | -0.23 | -0.19 | -0.1  | -0.2  | -0.28 | -0.11 |
| LDL                  | -0.04 | -0.01 | -0.17 | -0.08 | -0.05 | -0.17 | -0.29 | -0.15 |
| HDL                  | -0.09 | -0.03 | -0.2  | -0.05 | -0.06 | -0.21 | -0.32 | -0.15 |
| LDL+HDL              | -0.06 | -0.02 | -0.2  | -0.08 | -0.06 | -0.2  | -0.33 | -0.16 |
| Cholinesterase       | -0.12 | -0.04 | -0.21 | -0.12 | -0.08 | -0.22 | -0.32 | -0.15 |
| Prealbumin           | -0.06 | -0.02 | -0.19 | -0.1  | -0.1  | -0.2  | -0.29 | -0.16 |
| Free T3              | -0.19 | 0.01  | -0.2  | -0.12 | -0.06 | -0.13 | -0.26 | -0.07 |

Red color marks the correlation coefficients more than 0.2, and the green color marks the correlation coefficients less than -0.2.
